# Supplementary material for: Physiochemical and thermodynamic characterization of lipopeptide biosurfactant secreted by Bacillus tequilensis HK01
Source: Royal Society of Chemistry journal article supplement (doi:10.1039/c5ra17275f), 2015-01-01
Supplement: c5ra17275f1.pdf [file c5ra17275f1.pdf]

**Table S1.** Studied media of bacterial growth and biosurfactant production

| Medium       | M <sub>1</sub>                       |      | M <sub>2</sub>                       |      | M <sub>3</sub>                       |      |
|--------------|--------------------------------------|------|--------------------------------------|------|--------------------------------------|------|
| Amount (g/l) |                                      |      |                                      |      |                                      |      |
|              | Glucose                              | 20   | Glucose                              | 20   | Glucose                              | 20   |
|              | Na <sub>2</sub> HPO <sub>4</sub>     | 5.6  | NaNO <sub>3</sub>                    | 3    | NaNO <sub>3</sub>                    | 3    |
|              | KH <sub>2</sub> PO <sub>4</sub>      | 4    | Yeast Extract                        | 1    | Pepton                               | 1    |
|              | NH <sub>4</sub> NO <sub>3</sub>      | 4.5  | KH <sub>2</sub> PO <sub>4</sub>      | 0.25 | KH <sub>2</sub> PO <sub>4</sub>      | 0.25 |
|              | FeSO <sub>4</sub> ·7H <sub>2</sub> O | 0.01 | MgSO <sub>4</sub> ·7H <sub>2</sub> O | 0.25 | MgSO <sub>4</sub> ·7H <sub>2</sub> O | 0.25 |
| BS (g/l)     |                                      | 0    |                                      | 0    |                                      | 0    |

| Medium       | M <sub>4</sub>                       |      | M <sub>5</sub>                       |      | M <sub>6</sub>                       |      |
|--------------|--------------------------------------|------|--------------------------------------|------|--------------------------------------|------|
| Amount (g/l) |                                      |      |                                      |      |                                      |      |
|              | Glucose                              | 20   | Glucose                              | 20   | Lactose                              | 15   |
|              | Na <sub>2</sub> HPO <sub>4</sub>     | 5.6  | NaNO <sub>3</sub>                    | 3    | NaNO <sub>3</sub>                    | 3    |
|              | KH <sub>2</sub> PO <sub>4</sub>      | 4    | Yeast Extract                        | 1    | Yeast Extract                        | 1    |
|              | MgSO <sub>4</sub> ·7H <sub>2</sub> O | 0.2  | KH <sub>2</sub> PO <sub>4</sub>      | 0.25 | KH <sub>2</sub> PO <sub>4</sub>      | 0.25 |
|              | NH <sub>4</sub> NO <sub>3</sub>      | 4.5  | MgSO <sub>4</sub> ·7H <sub>2</sub> O | 0.25 | MgSO <sub>4</sub> ·7H <sub>2</sub> O | 0.25 |
|              | FeSO <sub>4</sub> ·7H <sub>2</sub> O | 0.01 | NaCl                                 | 7%   |                                      |      |
| BS (g/l)     |                                      | 0    |                                      | 0    |                                      | 0    |

| Medium       | M <sub>7</sub>                       |      | M <sub>8</sub>                       |      | M <sub>9</sub>                       |      |
|--------------|--------------------------------------|------|--------------------------------------|------|--------------------------------------|------|
| Amount (g/l) |                                      |      |                                      |      |                                      |      |
|              | Methanol                             | 20   | Maltose                              | 20   | Starch                               | 20   |
|              | NaNO <sub>3</sub>                    | 3    | NaNO <sub>3</sub>                    | 3    | NaNO <sub>3</sub>                    | 3    |
|              | Yeast Extract                        | 1    | Pepton                               | 1    | Pepton                               | 1    |
|              | KH <sub>2</sub> PO <sub>4</sub>      | 0.25 | KH <sub>2</sub> PO <sub>4</sub>      | 0.25 | KH <sub>2</sub> PO <sub>4</sub>      | 0.25 |
|              | MgSO <sub>4</sub> ·7H <sub>2</sub> O | 0.25 | MgSO <sub>4</sub> ·7H <sub>2</sub> O | 0.25 | MgSO <sub>4</sub> ·7H <sub>2</sub> O | 0.25 |
| BS (g/l)     |                                      | 0    |                                      | 0    |                                      | 0    |

| Medium       | M <sub>10</sub>                      |      | M <sub>11</sub>                      |      | M <sub>12</sub>                      |      |
|--------------|--------------------------------------|------|--------------------------------------|------|--------------------------------------|------|
| Amount (g/l) |                                      |      |                                      |      |                                      |      |
|              | Glucose                              | 20   | Glucose                              | 20   | Glucose                              | 15   |
|              | NaNO <sub>3</sub>                    | 3    | Na <sub>2</sub> HPO <sub>4</sub>     | 5.6  | NaNO <sub>3</sub>                    | 3    |
|              | Pepton                               | 1    | KH <sub>2</sub> PO <sub>4</sub>      | 4    | Pepton                               | 2    |
|              | KH <sub>2</sub> PO <sub>4</sub>      | 0.25 | NH <sub>4</sub> NO <sub>3</sub>      | 4.5  | KH <sub>2</sub> PO <sub>4</sub>      | 0.25 |
|              | MgSO <sub>4</sub> ·7H <sub>2</sub> O | 0.25 | FeSO <sub>4</sub> ·7H <sub>2</sub> O | 0.01 | MgSO <sub>4</sub> ·7H <sub>2</sub> O | 0.25 |
|              | Trace                                | 1 cc | Pepton                               | 1    | Trace                                | 1 cc |
|              |                                      |      | MgSO <sub>4</sub> ·7H <sub>2</sub> O | 0.2  |                                      |      |
| BS (g/l)     |                                      | 0    |                                      | 0    |                                      | 0    |

| Medium       | M <sub>13</sub>                      | M <sub>14</sub> | M <sub>15</sub>                                    |      |                                      |       |
|--------------|--------------------------------------|-----------------|----------------------------------------------------|------|--------------------------------------|-------|
| Amount (g/l) |                                      |                 |                                                    |      |                                      |       |
|              | Glucose                              | 15              | Glycerol                                           | 20   | Sunflower oil                        | 10    |
|              | Na <sub>2</sub> HPO <sub>4</sub>     | 5.6             | Yeast Extract                                      | 45.6 | CaCl <sub>2</sub> ·2H <sub>2</sub> O | 0.1   |
|              | KH <sub>2</sub> PO <sub>4</sub>      | 4               | Peptone                                            | 5    | KH <sub>2</sub> PO <sub>4</sub>      | 2     |
|              | Peptone                              | 2               | KH <sub>2</sub> PO <sub>4</sub>                    | 2.8  | K <sub>2</sub> HPO <sub>4</sub>      | 5     |
|              | MgSO <sub>4</sub> ·7H <sub>2</sub> O | 0.2             | K <sub>2</sub> HPO <sub>4</sub> ·3H <sub>2</sub> O | 4.8  | NH <sub>4</sub> NO <sub>3</sub>      | 3     |
|              | NH <sub>4</sub> NO <sub>3</sub>      | 4.5             |                                                    |      | NaNO <sub>3</sub>                    | 2     |
|              | FeSO <sub>4</sub> ·7H <sub>2</sub> O | 0.01            |                                                    |      | MgSO <sub>4</sub> ·7H <sub>2</sub> O | 0.2   |
|              |                                      |                 |                                                    |      | Trace                                | 1 cc  |
| BS (g/l)     |                                      | 0               |                                                    | 0    |                                      | 0.448 |

| Medium       | M <sub>16</sub>                      | M <sub>17</sub> | M <sub>18</sub>                      |       |                                      |       |
|--------------|--------------------------------------|-----------------|--------------------------------------|-------|--------------------------------------|-------|
| Amount (g/l) |                                      |                 |                                      |       |                                      |       |
|              | Glucose                              | 15              | Sunflower oil                        | 10    | Sunflower oil                        | 10    |
|              | malt extract                         | 1               | malt extract                         | 1     | NaNO <sub>3</sub>                    | 2     |
|              | Na <sub>2</sub> HPO <sub>4</sub>     | 5               | Na <sub>2</sub> HPO <sub>4</sub>     | 5     | KH <sub>2</sub> PO <sub>4</sub>      | 2     |
|              | KCl                                  | 1               | K <sub>2</sub> HPO <sub>4</sub>      | 1     | NH <sub>4</sub> NO <sub>3</sub>      | 3     |
|              | NH <sub>4</sub> NO <sub>3</sub>      | 4               | NH <sub>4</sub> NO <sub>3</sub>      | 4     | MgSO <sub>4</sub> ·7H <sub>2</sub> O | 0.25  |
|              | MgSO <sub>4</sub> ·7H <sub>2</sub> O | 0.25            | MgSO <sub>4</sub> ·7H <sub>2</sub> O | 0.25  | CaCl <sub>2</sub> ·2H <sub>2</sub> O | 0.1   |
|              | KH <sub>2</sub> PO <sub>4</sub>      | 1               | KH <sub>2</sub> PO <sub>4</sub>      | 1     | KCl                                  | 1     |
|              | FeSO <sub>4</sub> ·7H <sub>2</sub> O | 0.01            | FeSO <sub>4</sub> ·7H <sub>2</sub> O | 0.01  | malt extract                         | 1     |
|              | Peptone                              | 1               | Peptone                              | 1     |                                      |       |
| BS (g/l)     |                                      | 0.204           |                                      | 0.362 |                                      | 0.784 |



**Table S3.** Central composite design matrix of RSM with experimental values of biosurfactant production

| Std order | Sunflower oil | NH <sub>4</sub> NO <sub>3</sub> | MgSO <sub>4</sub> .7H <sub>2</sub> O | malt extract | BS (g/l) |
|-----------|---------------|---------------------------------|--------------------------------------|--------------|----------|
| 29        | 6             | 2                               | 0.6                                  | 2            | 0.465    |
| 12        | 10            | 3                               | 0.2                                  | 3            | 0.621    |
| 2         | 10            | 1                               | 0.2                                  | 1            | 0.660    |
| 8         | 10            | 3                               | 1                                    | 1            | 0.652    |
| 15        | 2             | 3                               | 1                                    | 3            | 0.331    |
| 23        | 6             | 2                               | 0.6                                  | 0.75         | 0.273    |
| 22        | 6             | 2                               | 1.1                                  | 2            | 0.572    |
| 9         | 2             | 1                               | 0.2                                  | 3            | 0.311    |
| 5         | 2             | 1                               | 1                                    | 1            | 0.001    |
| 24        | 6             | 2                               | 0.6                                  | 3.25         | 0.428    |
| 6         | 10            | 1                               | 1                                    | 1            | 0.696    |
| 3         | 2             | 3                               | 0.2                                  | 1            | 0.503    |
| 19        | 6             | 0.75                            | 0.6                                  | 2            | 0.491    |
| 31        | 6             | 2                               | 0.6                                  | 2            | 0.466    |
| 10        | 10            | 1                               | 0.2                                  | 3            | 0.765    |
| 28        | 6             | 2                               | 0.6                                  | 2            | 0.391    |
| 18        | 11            | 2                               | 0.6                                  | 2            | 0.884    |
| 26        | 6             | 2                               | 0.6                                  | 2            | 0.472    |
| 27        | 6             | 2                               | 0.6                                  | 2            | 0.383    |
| 4         | 10            | 3                               | 0.2                                  | 1            | 0.858    |
| 1         | 2             | 1                               | 0.2                                  | 1            | 0.206    |
| 17        | 1             | 2                               | 0.6                                  | 2            | 0.187    |
| 20        | 6             | 3.25                            | 0.6                                  | 2            | 0.437    |
| 7         | 2             | 3                               | 1                                    | 1            | 0.087    |
| 25        | 6             | 2                               | 0.6                                  | 2            | 0.495    |
| 21        | 6             | 2                               | 0.1                                  | 2            | 0.526    |
| 14        | 10            | 1                               | 1                                    | 3            | 1.761    |
| 13        | 2             | 1                               | 1                                    | 3            | 0.634    |
| 16        | 10            | 3                               | 1                                    | 3            | 0.952    |
| 11        | 2             | 3                               | 0.2                                  | 3            | 0.183    |
| 30        | 6             | 2                               | 0.6                                  | 2            | 0.484    |

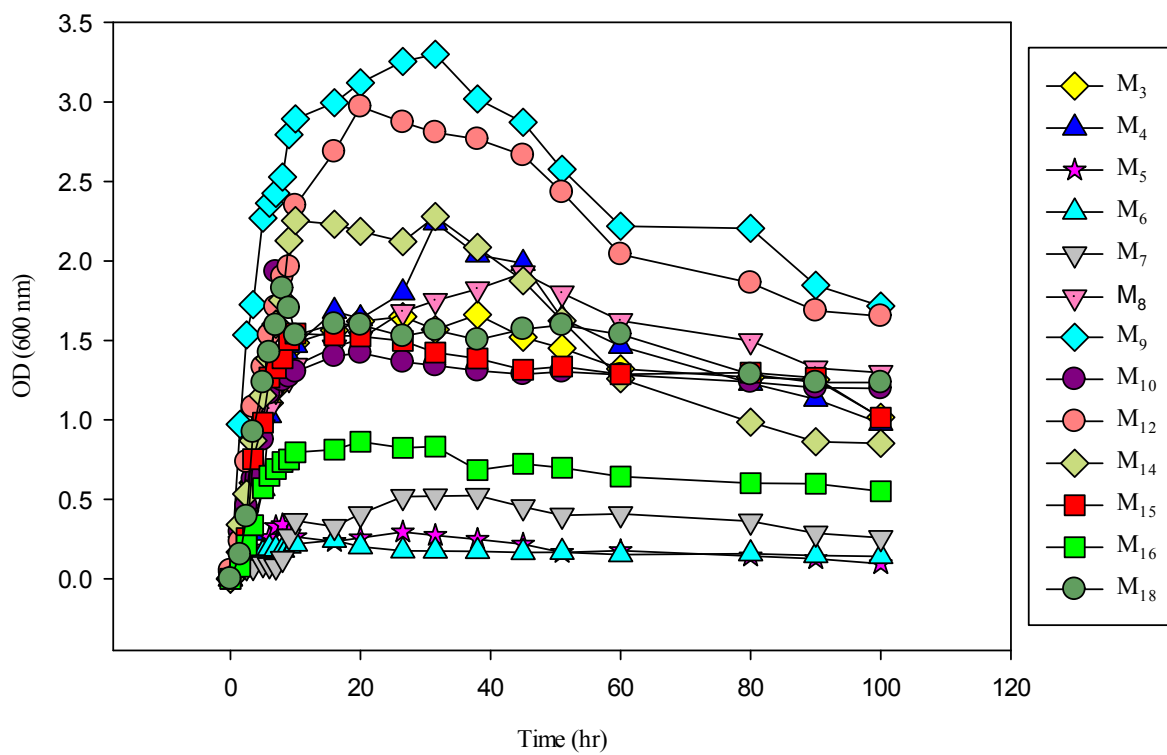

**Fig. S1.** Growth behavior of studied media

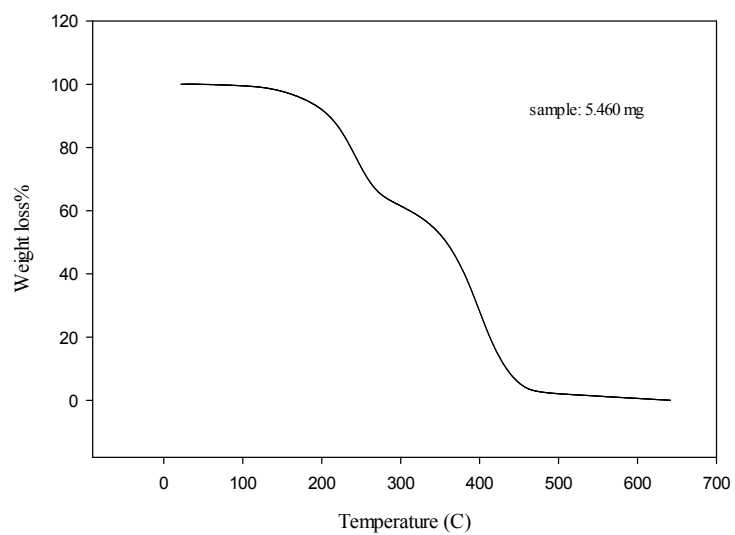

**Fig. S2.** TGA graph of the produced biosurfactant by *Bacillus tequilensis*

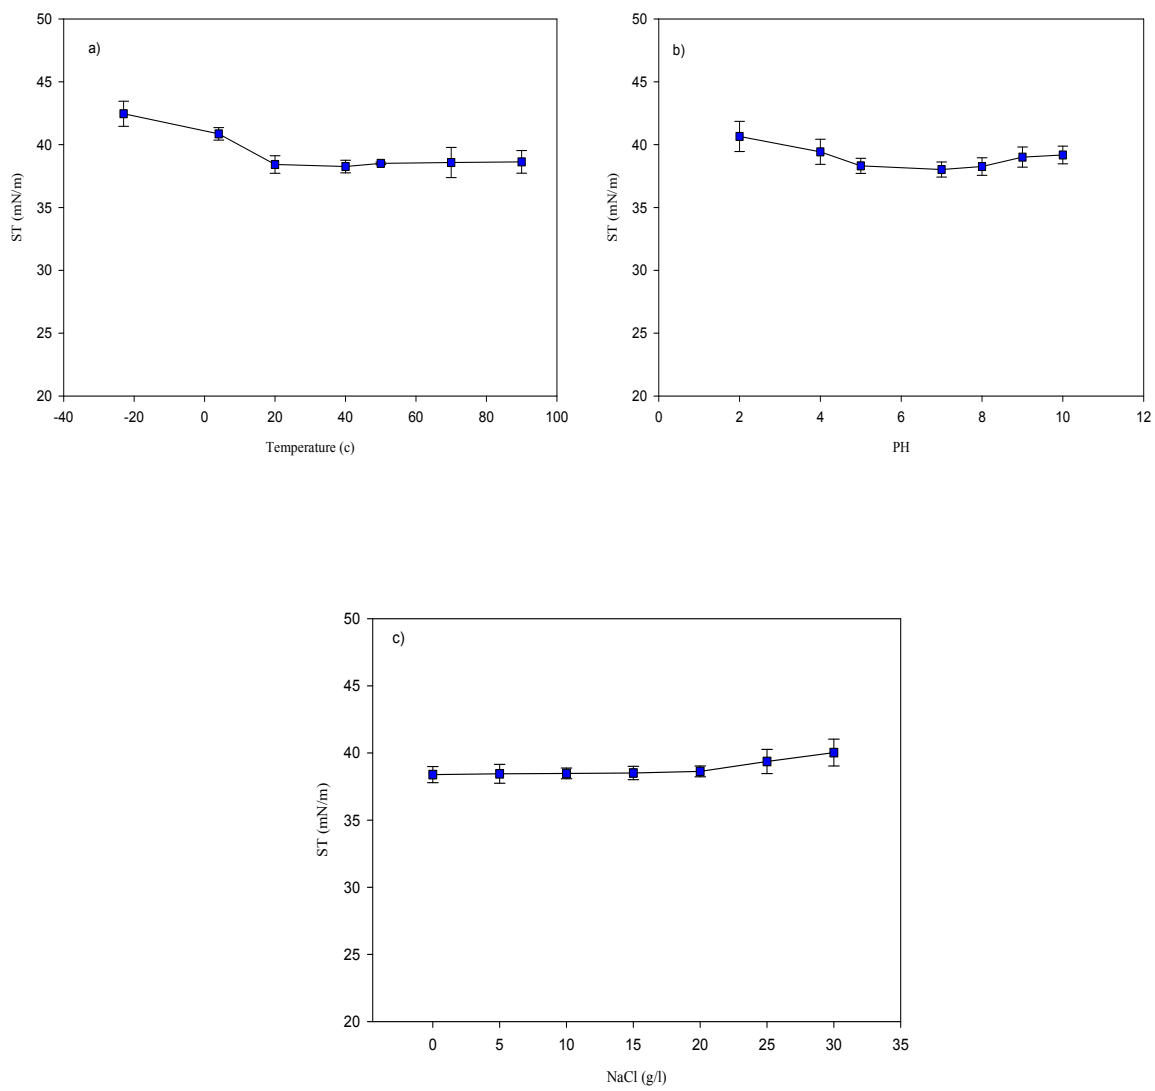

**Fig. S3.** Effects of different physical and chemical factors including a) Temperature b) pH and c) Salinity on the surface activity of the lipopeptide biosurfactant

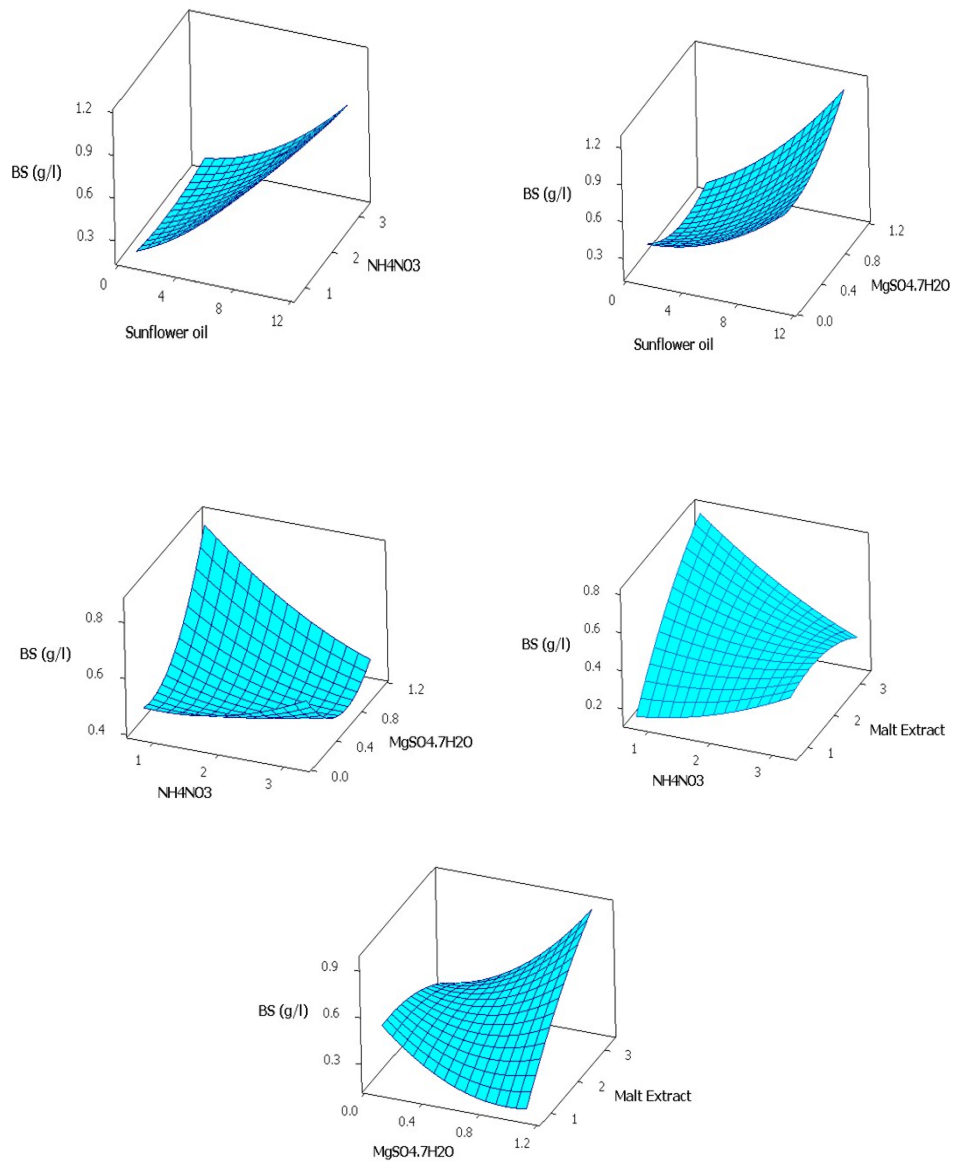

**Fig. S4.** Response surface graphs resulting from mutual interaction of factors
